# Supplementary material for: Quantitative real-time PCR analysis of bacterial biomarkers enable fast and accurate monitoring in inflammatory bowel disease
Source: PeerJ. 2022 Oct 18;10:e14217. doi: 10.7717/peerj.14217 (PMC9586115; doi:10.7717/peerj.14217)
Supplement: Supplemental Information 6 [file peerj-10-14217-s006.docx]

**Supplemental Table 4.** Bacterial species unique to and shared between Ulcerative Colitis (UC), Crohn disease (CD), and Control groups

| **Group** | **Bacterial Species** |
| --- | --- |
| Only found in UC | | *Actinomyces odontolyticus* | | --- | | *Actinomyces turicensis* | | *Aeromonas caviae* | | *Aggregatibacter aphrophilus* | | *Anaerococcus vaginalis* | | *Bacteroides finegoldii* | | *Bifidobacterium pseudolongum* | | *Citrobacter freundii* | | *Clostridium butyricum* | | *Clostridium chromiireducens* | | *Clostridium clostridioforme* | | *Clostridium innocuum* | | *Clostridium paraputrificum* | | *Clostridium polysaccharolyticum* | | *Clostridium tertium* | | *Comamonas kerstersii* | | *Cuneatibacter caecimuris* | | *Dialister invisus* | | *Dorea formicigenerans* | | *Eggerthella lenta* | | *Eikenella corrodens* | | *Eisenbergiella tayi* | | *Enterococcus canis* | | *Enterococcus casseliflavus* | | *Enterococcus durans* | | *Enterococcus faecalis* | | *Enterococcus faecium* | | *Enterococcus saigonensis* | | *Erysipelatoclostridium ramosum* | | *Eubacterium ramulus* | | *Faecalicatena orotica* | | *Fusobacterium gastrosuis* | | *Fusobacterium periodonticum* | | *Fusobacterium simiae* | | *Fusobacterium varium* | | *Haemophilus aegyptius* | | *Haemophilus haemolyticus* | | *Haemophilus massiliensis* | | *Haemophilus parainfluenzae* | | *Haemophilus paraphrohaemolyticus* | | *Haemophilus pittmaniae* | | *Holdemanella biformis* | | *Hungatella effluvii* | | *Intestinibacter bartlettii* | | *Klebsiella pneumoniae* | | *Klebsiella variicola* | | *Lactobacillus brantae* | | *Lactobacillus fermentum* | | *Lactobacillus gallinarum* | | *Lactobacillus parabuchneri* | | *Lactobacillus porcinae* | | *Lactobacillus rhamnosus* | | *Lactobacillus salivarius* | | *Leptotrichia trevisanii* | | *Leptotrichia wadei* | | *Megasphaera micronuciformis* | | *Muricomes intestini* | | *Parvimonas micra* | | *Pediococcus stilesii* | | *Peptoniphilus duerdenii* | | *Peptoniphilus grossensis* | | *Peptoniphilus koenoeneniae* | | *Peptostreptococcus anaerobius* | | *Peptostreptococcus stomatis* | | *Prevotella buccae* | | *Prevotella buccalis* | | *Prevotella denticola* | | *Prevotella melaninogenica* | | *Prevotella oris* | | *Prevotella shahii* | | *Prevotella stercorea* | | *Rothia mucilaginosa* | | *Shigella sonnei* | | *Solobacterium moorei* | | *Streptococcus agalactiae* | | *Streptococcus alactolyticus* | | *Streptococcus gordonii* | | *Streptococcus hongkongensis* | | *Streptococcus macedonicus* | | *Streptococcus massiliensis* | | *Streptococcus mitis* | | *Streptococcus porcorum* | | *Streptococcus rubneri* | | *Streptococcus salivarius* | | *Streptococcus sinensis* | | *Veillonella atypica* | | *Veillonella rogosae* | |
|  |  |
| Only found in CD |  |
|  | | *Abiotrophia defectiva* | | --- | | *Bacteroides cellulosilyticus* | | *Bacteroides coprocola* | | *Bifidobacterium merycicum* | | *Clostridium bolteae* | | *Eisenbergiella massiliensis* | | *Ilumatobacter nonamiensis* | | *Incertae Sedis* | | *Jonquetella anthropi* | | *Lactococcus chungangensis* | | *Lactococcus lactis* | | *Lactococcus piscium* | | *Lactococcus taiwanensis* | | *Megamonas funiformis* | | *Parabacteroides johnsonii* | | *Prevotella maculosa* | | *Streptobacillus moniliformis* | | *Streptococcus vestibularis* | | *Sutterella parvirubra* | | *Tannerella forsythia* | |
| Only found in Control group |  |
|  | | *Acidaminococcus intestini* | | --- | | *Adlercreutzia equolifaciens* | | *Alistipes finegoldii* | | *Alistipes obesi* | | *Alistipes putredinis* | | *Alistipes senegalensis* | | *Alistipes shahii* | | *Anaerofilum pentosovorans* | | *Anaeromassilibacillus senegalensis* | | *Anaerotaenia torta* | | *Bacteroides barnesiae* | | *Bacteroides caccae* | | *Bacteroides caecimuris* | | *Bacteroides eggerthii* | | *Bacteroides intestinalis* | | *Bacteroides oleiciplenus* | | *Bacteroides salyersiae* | | *Bacteroides stercorirosoris* | | *Barnesiella intestinihominis* | | *Butyricimonas faecihominis* | | *Butyricimonas paravirosa* | | *Butyricimonas synergistica* | | *Dialister propionicifaciens* | | *Eubacterium ventriosum* | | *Eubacterium xylanophilum* | | *Faecalicoccus acidiformans* | | *Holdemania filiformis* | | *Lachnospira pectinoschiza* | | *Massiliomicrobiota timonensis* | | *Murimonas intestini* | | *Negativibacillus massiliensis* | | *Oxalobacter formigenes* | | *Parabacteroides distasonis* | | *Parabacteroides gordonii* | | *Parabacteroides merdae* | | *Paraprevotella clara* | | *Phascolarctobacterium succinatutens* | | *Prevotella disiens* | | *Pseudobutyrivibrio ruminis* | | *Pseudoflavonifractor phocaeensis* | | *Ruminococcus albus* | | *Ruminococcus callidus* | | *Senegalimassilia anaerobia* | | *Succinatimonas hippei* | | *Sutterella massiliensis* | | *Sutterella wadsworthensis* | | *Sutturella timonensis* | | *Victivallis vadensis* | |
|  |  |
| Found in all three groups |  |
|  | | *Akkermansia muciniphila* | | --- | | *Alistipes onderdonkii* | | *Anaerostipes hadrus* | | *Bacteroides faecis* | | *Bacteroides fragilis* | | *Bacteroides massiliensis* | | *Bacteroides ovatus* | | *Bacteroides plebeius* | | *Bacteroides uniformis* | | *Bacteroides vulgatus* | | *Bacteroides xylanisolvens* | | *Bifidobacterium catenulatum* | | *Blautia obeum* | | *Butyricimonas virosa* | | *Collinsella aerofaciens* | | *Dialister succinatiphilus* | | *Dorea longicatena* | | *Escherichia coli* | | *Faecalibacterium prausnitzii* | | *Fusicatenibacter saccharivorans* | | *Gemmiger formicilis* | | *Kineothrix alysoides* | | *Lactobacillus rogosae* | | *Romboutsia timonensis* | | *Ruminococcus bromii* | | *Ruminococcus lactaris* | | *Ruminococcus torques* | | *Ruthenibacterium lactatiformans* | | *Streptococcus thermophilus* | |
|  |  |
