# Supplementary material for: Quantitative real-time PCR analysis of bacterial biomarkers enable fast and accurate monitoring in inflammatory bowel disease
Source: PeerJ. 2022 Oct 18;10:e14217. doi: 10.7717/peerj.14217 (PMC9586115; doi:10.7717/peerj.14217)
Supplement: Supplemental Information 7 [file peerj-10-14217-s007.xlsx]

## Sheet: PatientData
Patient_ID	Group	Type	ATG16L1Genotype	IL23RGenotype	F. prausnitzii CT Value	A. muciniphila CT value	B. vulgatus CT value	S. thermophilus CT value	Shiga toxin-producing E. coli CT Value	C. difficile CT value	Total Bacteria CT Value	Shannon Index	Simpson Index	Observed Taxa	Ace Index	Chao1 Index	Age	Sex	Smoking	DrugsUsed	Treatment	Surgery	Mayo Score	Harvey-Bradshaw Index	CRP	CRP>5	Disease Duration (Years)
1	UC	Left-sided	GG	GG	14.27	45	26.6204	28.9412	0	0	11.21	NA	NA	NA	NA	NA	69	M	1	mesalazin	Non-Biologics	0	4	NA	2	0	1
2	CD	ileocolonic	AG	GG	17.27	40.5884	27.1227	25.756	42.4826	0	16.49	NA	NA	NA	NA	NA	59	M	0	mesalazin, AZT	Non-Biologics	0	NA	3	2	0	2
3	CD	NA	GG	GG	15.74	40.766	24.9389	24.2878	0	0	13.72	NA	NA	NA	NA	NA	50	F	0	sertolizumab	Biologics	1	NA	6	2	0	5
4	CD	ileocolonic	GG	GG	22.83	26.5423	23.3454	24.6018	0	0	13.92	0.94	0.38	26	27.82	28	68	F	0	infliximab	Biologics	0	NA	7	1.5	0	6
5	CD	Colonic	GG	GG	16.5	45	20.2718	26.1074	0	0	11.66	NA	NA	NA	NA	NA	31	M	0	adalimumab	Biologics	1	NA	3	0.5	0	12
6	CD	ileocolonic	GG	GG	15.19	42.4421	40.6543	26.9071	0	0	14.61	NA	NA	NA	NA	NA	24	M	0	mesalazin, AZT	Non-Biologics	0	NA	6	9.7	1	1
7	CD	Colonic	AG	GG	21.85	45	40.5594	29.1935	0	32.773	20.15	NA	NA	NA	NA	NA	49	F	0	vedolizumb	Biologics	0	NA	13	10	1	2
8	CD	ileal	AA	GG	16.93	37.6004	27.1397	26.802	0	0	11.3	NA	NA	NA	NA	NA	54	M	0	adalimumab	Biologics	0	NA	7	20	1	1
9	CD	Colonic	AA	GG	16.9	22.7507	23.8311	26.4926	37.6417	0	12.17	NA	NA	NA	NA	NA	73	M	1	mesalazin, AZT	Non-Biologics	0	NA	3	2	0	9
10	CD	Surgery	GG	GG	16.82	45	24.9378	35.3221	0	0	14.26	NA	NA	NA	NA	NA	52	M	0	adalimumab	Biologics	1	NA	2	0.6	0	10
11	CD	Surgery	AG	GA	33.69	45	19.2777	28.0206	0	0	13.52	0.6	0.33	9	12.67	10	48	M	0	infliximab	Biologics	1	NA	7	8	1	11
12	CD	Colonic	AA	GG	13.6	41.5823	17.7151	29.6297	0	0	13.66	NA	NA	NA	NA	NA	47	F	0	vedolizumab	Biologics	0	NA	11	15	1	8
13	CD	Surgery	GG	GA	31.78	45	41.3737	23.1818	0	0	13.01	0.5	0.26	27	27	27	55	M	1	sertolizumab	Biologics	1	NA	9	42	1	9
14	UC	Pancolitis	GG	GG	18.94	45	19.7219	28.2386	0	0	14.17	NA	NA	NA	NA	NA	51	M	1	vedolizumab	Biologics	0	9	NA	10	1	1
15	UC	Pancolitis	AA	GG	33.68	45	45	21.504	0	0	13.58	1.61	0.71	21	21	21	34	M	0	vedolizumab	Biologics	0	5	NA	4	0	1
16	UC	Left-sided	GG	GG	31.4	45	42.7623	22.7468	0	0	14.78	0.45	0.16	12	12	12	47	F	0	vedolizumab	Biologics	0	NA	9	2	0	10
17	UC	Pancolitis	AG	GG	13.69	35.4932	18.7792	25.5495	0	0	10.91	NA	NA	NA	NA	NA	47	F	0	adalimumab	Biologics	0	3	NA	9	1	22
18	UC	Distal	AG	GG	19.79	42.2837	21.3968	30.2463	0	0	13.66	2.1	0.79	55	55	55	39	F	0	mesalazin lavman	Non-Biologics	0	6	NA	3	0	15
19	Control	Control	AG	GG	15.9	34.949	23.8653	22.5883	41.3414	0	12.82	2.12	0.83	22	25.07	23.5	33	F	0	NA	NA	NA	NA	NA	NA	NA	NA
20	Control	Control	AA	GG	21.21	34	23	42.6448	0	0	22.54	3.13	0.91	63	63	63	29	F	0	NA	NA	NA	NA	NA	NA	NA	NA
21	Control	Control	AG	GG	15.47	37.0796	29.5128	26.006	0	0	11.81	NA	NA	NA	NA	NA	31	M	0	NA	NA	NA	NA	NA	NA	NA	NA
22	Control	Control	GG	GG	12.79	32.0023	20.0786	21.5148	0	0	11.13	1.86	0.66	32	43.04	50	32	M	0	NA	NA	NA	NA	NA	NA	NA	NA
